# Supplementary material
Source: PubMed Central journal article supplement (PMC1470643)

**T. brucei chromosome 1**

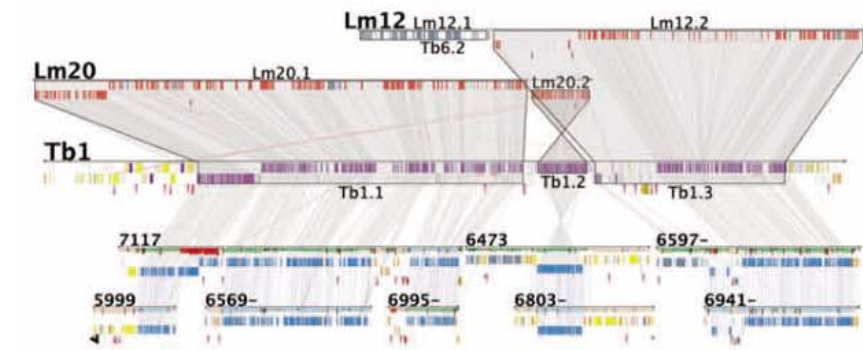

**T. brucei chromosome 3**

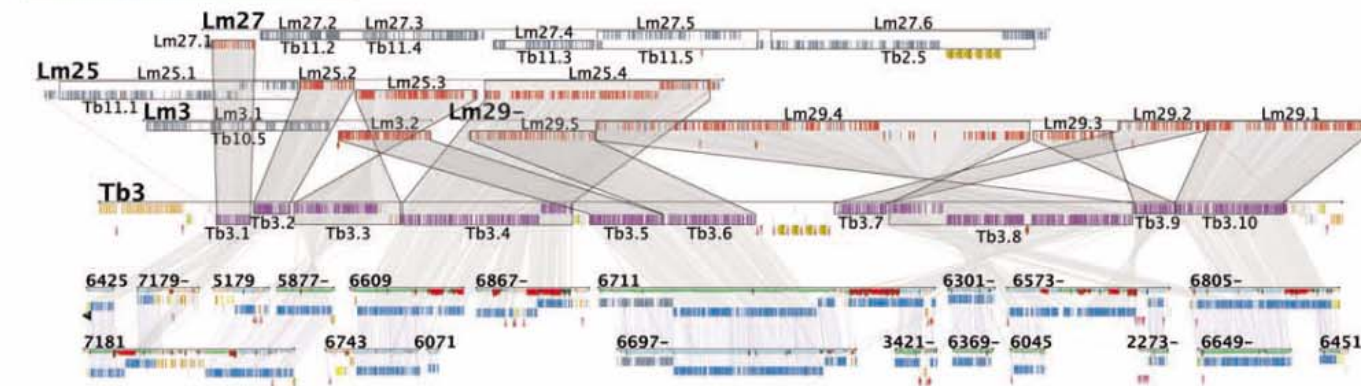

**T. brucei chromosome 7**

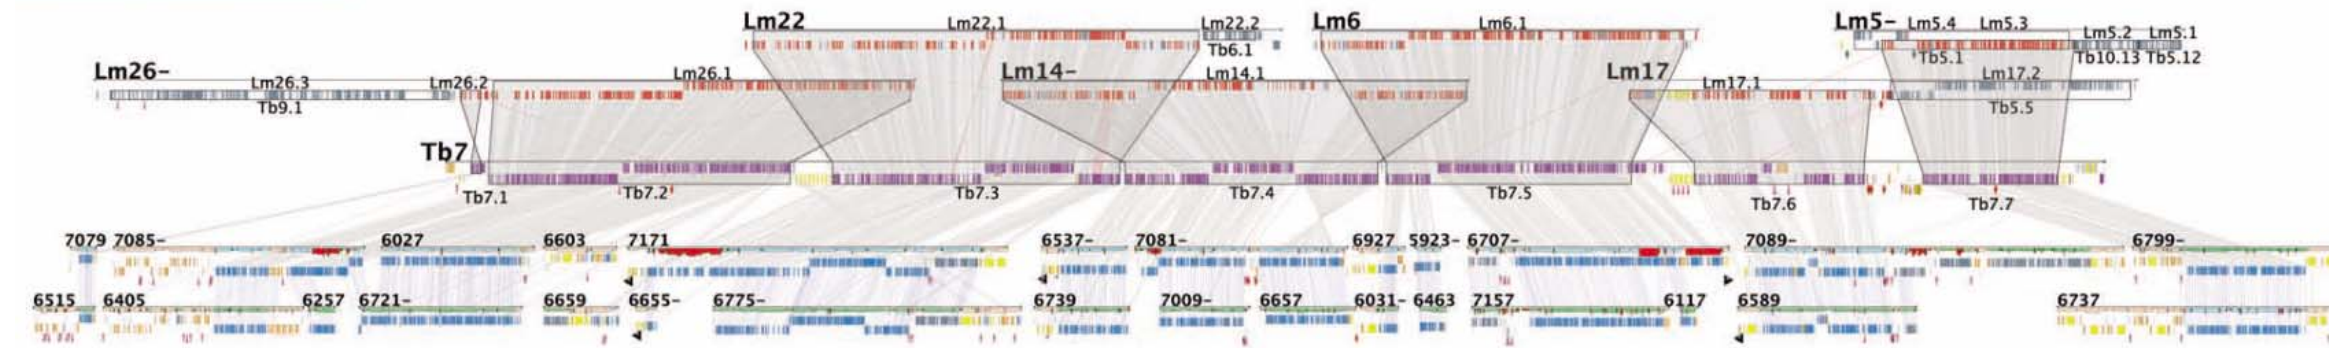

**T. brucei chromosome 11**

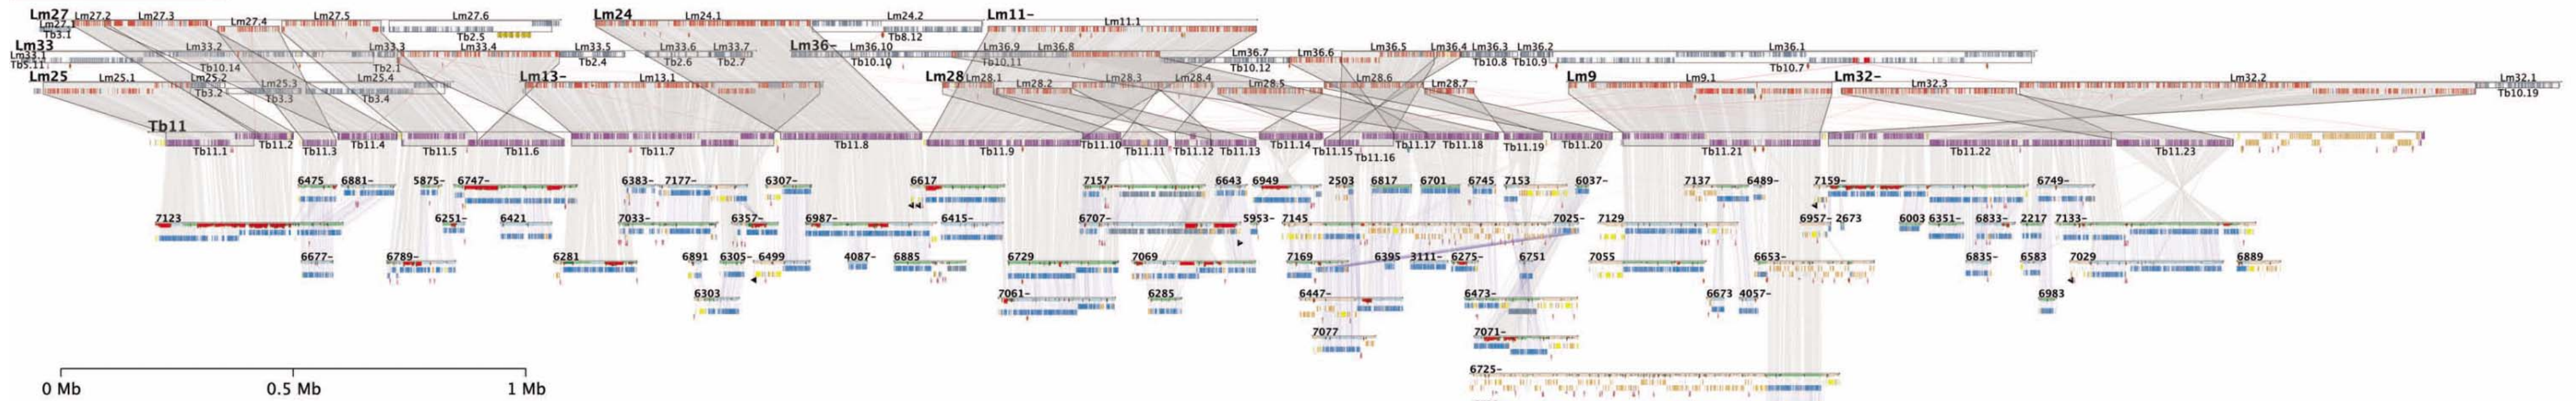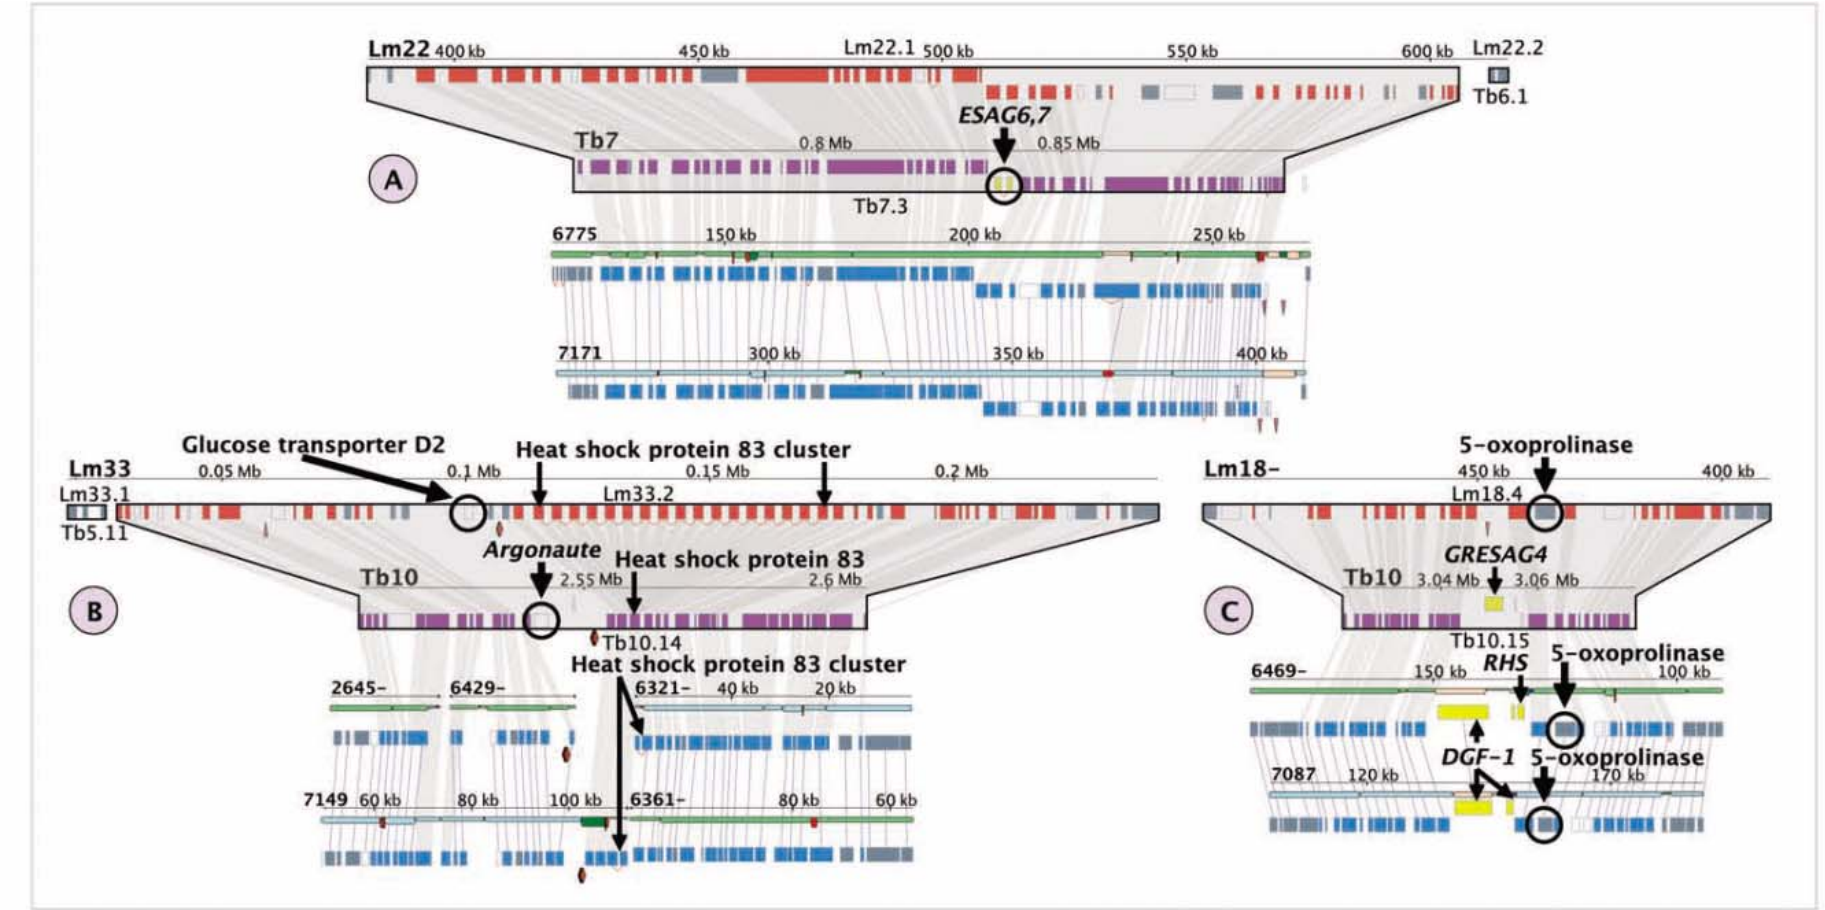

| Protein-coding genes                                                                                                                                                                                                                                                                                                                                                                                                                                                                           | Highlighted protein families                                                                                                                                                                                                             | Clusters of orthologous genes (COGs)                                                                                                                                                                                                                                         | RNA genes                                                                                                                                                                                                                                                                                       | Repeats                                                                                                                                                                                                                                                                                                                     | T. cruzi-specific features                                                                                                                                                                                                                                                                                                                                                                                                                                                                                 |
|------------------------------------------------------------------------------------------------------------------------------------------------------------------------------------------------------------------------------------------------------------------------------------------------------------------------------------------------------------------------------------------------------------------------------------------------------------------------------------------------|------------------------------------------------------------------------------------------------------------------------------------------------------------------------------------------------------------------------------------------|------------------------------------------------------------------------------------------------------------------------------------------------------------------------------------------------------------------------------------------------------------------------------|-------------------------------------------------------------------------------------------------------------------------------------------------------------------------------------------------------------------------------------------------------------------------------------------------|-----------------------------------------------------------------------------------------------------------------------------------------------------------------------------------------------------------------------------------------------------------------------------------------------------------------------------|------------------------------------------------------------------------------------------------------------------------------------------------------------------------------------------------------------------------------------------------------------------------------------------------------------------------------------------------------------------------------------------------------------------------------------------------------------------------------------------------------------|
| <ul style="list-style-type: none"> <li><span style="color:red">■</span> <i>L. major</i> gene with a COG match (match shown)</li> <li><span style="color:blue">■</span> <i>T. brucei</i> gene with a COG match (match shown)</li> <li><span style="color:purple">■</span> <i>T. cruzi</i> gene with a COG match (match shown)</li> <li><span style="color:grey">■</span> Gene with no COG matches</li> <li><span style="color:blue">■</span> Gene with a COG match (match not shown)</li> </ul> | <ul style="list-style-type: none"> <li><span style="color:yellow">■</span> Putative surface proteins: mucin, MASP, trans-sialidase, GP63, VSG</li> <li><span style="color:orange">■</span> RHS, ESAG/ESAG-like protein, DGF-1</li> </ul> | <ul style="list-style-type: none"> <li><span style="color:red">■</span> Genes in the same COG (syntenic match)</li> <li><span style="color:purple">■</span> Genes in the same COG (nonsyntenic match)</li> <li><span style="color:purple">■</span> Syntenic block</li> </ul> | <ul style="list-style-type: none"> <li><span style="color:red">■</span> tRNA</li> <li><span style="color:orange">■</span> snoRNA</li> <li><span style="color:green">■</span> snRNA</li> <li><span style="color:blue">■</span> sRNA</li> <li><span style="color:yellow">■</span> rRNA</li> </ul> | <ul style="list-style-type: none"> <li><span style="color:red">■</span> Subtelomeric repeat</li> <li><span style="color:blue">■</span> Telomeric repeat</li> <li><span style="color:orange">■</span> Retrotransposons: ingi, DIRE, LITc, VIPER</li> <li><span style="color:red">■</span> Tandemly repeated genes</li> </ul> | <ul style="list-style-type: none"> <li><span style="color:green">■</span> Heterozygous Esmeraldo-like haplotype</li> <li><span style="color:blue">■</span> Haploid non-Esmeraldo-like haplotype</li> <li><span style="color:orange">■</span> Repetitive region</li> <li><span style="color:blue">■</span> Heterozygous non-Esmeraldo-like haplotype</li> <li><span style="color:red">■</span> Region of combined assembly</li> <li><span style="color:blue">■</span> <i>T. cruzi</i> haplotypes</li> </ul> |



*Trypanosoma brucei* genome organization

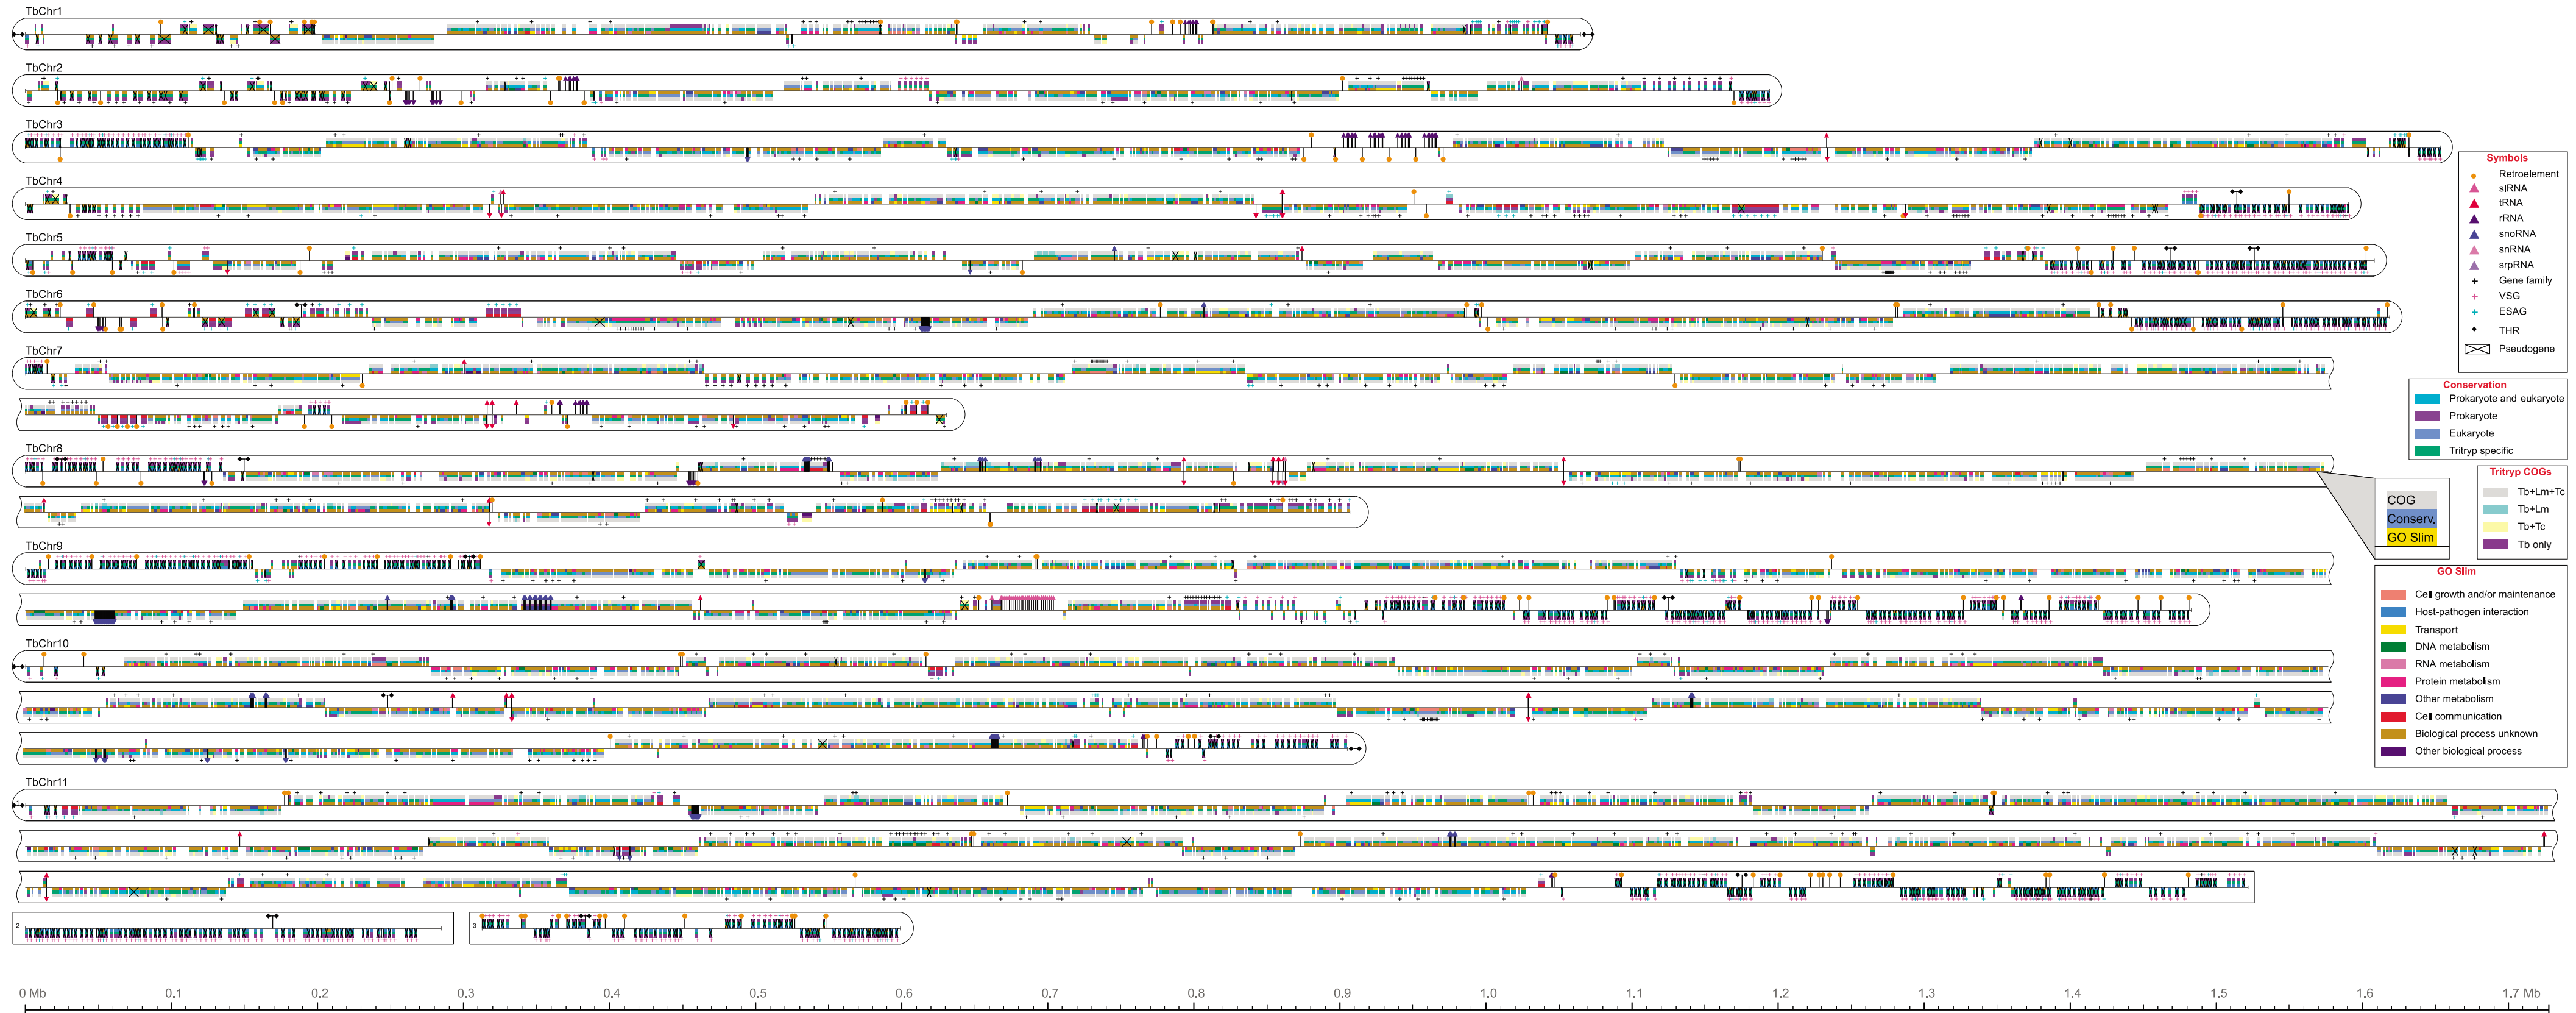

*Leishmania major* genome organization

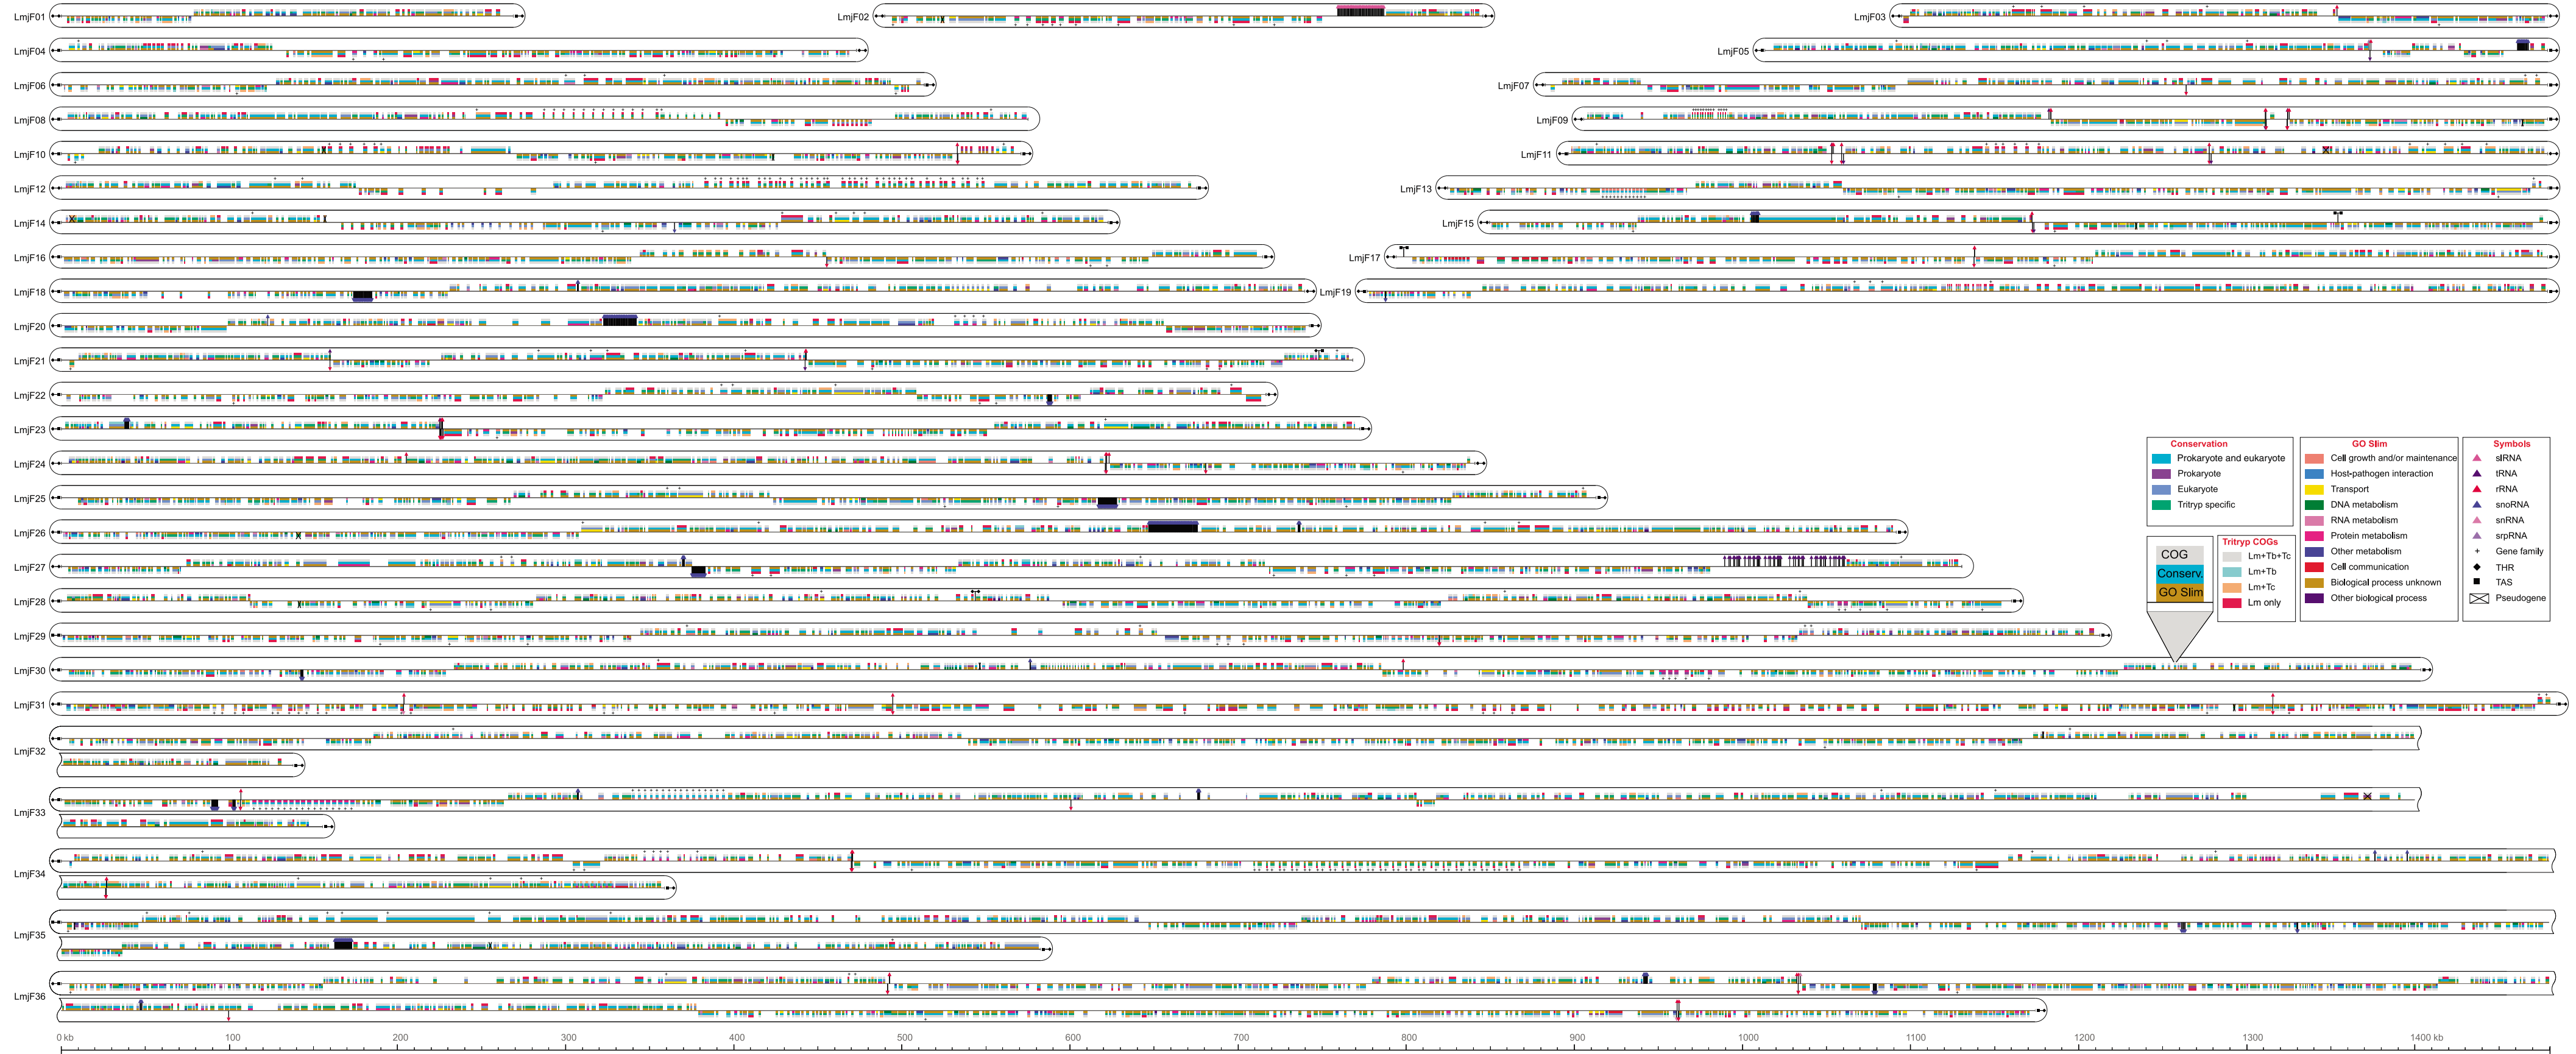

Supplement: NIHMS9966-supplement-2.pdf [file NIHMS9966-supplement-2.pdf]
